# Supplementary material
Source: PubMed Central journal article supplement (PMC4503656)
Supplement: 14_173_Li_Suppl.pdf [file 14_173_Li_Suppl.pdf]

Supplemental Data

Developmental Stage-Specific Hepatocytes Induce Maturation of HepG2 Cells by Rebuilding the Regulatory Circuit

Yanning Li,<sup>1\*</sup> Demei Liu,<sup>2\*</sup> Yanhong Zong,<sup>2\*</sup> Jinsheng Qi,<sup>2</sup> Bin Li,<sup>2</sup> Kun Liu,<sup>2</sup> and Hui Xiao<sup>2</sup>

Online address: <http://www.molmed.org>

The Feinstein Institute for Medical Research North Shore LIJ  
Empowering Imagination. Pioneering Discovery.®

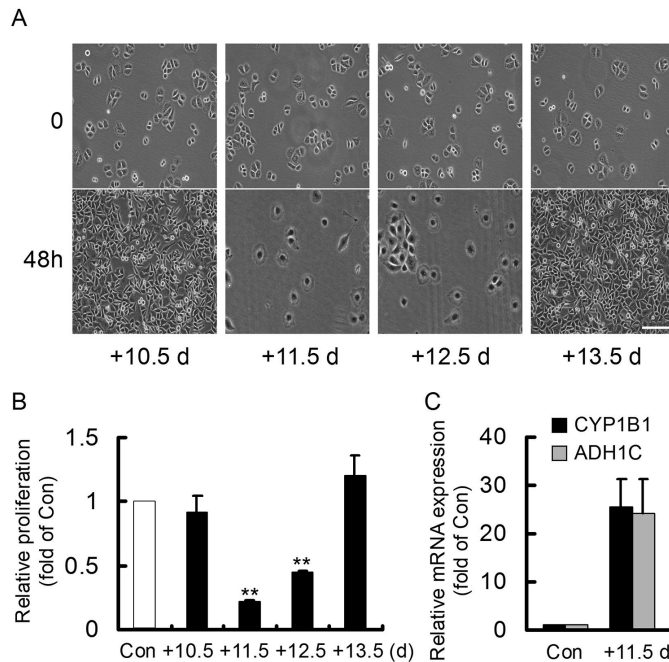

**Supplementary Figure S1.** Induced maturation of SMMC-7721 cells. (A) After treated with 10.5-, 11.5-, 12.5- and 13.5-d mouse embryonic hepatocyte medium, SMMC-7721 cells were observed. The existing adherent SMMC-7721 cells became round and hexagonal in 11.5-d and 12.5-d groups, however, in 12.5-d and 15.5-d groups, obvious change was hardly observed. Scale bar = 50  $\mu$ m. (B) The proliferation of induced SMMC-7721 cells was detected by MTT, which was significantly inhibited in 11.5-d and 12.5-d groups. (C) The expression of CYP1B1 and ADH1C in SMMC-7721 cells treated with 11.5-d embryonic hepatocyte medium increased dramatically. \*\* $P < .01$  vs. Con (control). The experiment was repeated three times.

**Supplementary Table S1.** Primers used for real-time PCR detection.

|                        | Primers                       | Annealing temperature | Product size |
|------------------------|-------------------------------|-----------------------|--------------|
| CYP3A4: Sense          | 5' ACGGGACTATTCCACCACC 3'     | 60 °C                 | 234 bp       |
| Anti-sense             | 5' TGTGCAGGAAAGCATCTGATA 3'   |                       |              |
| CYP1B1: Sense          | 5' AGTGCAGGCAGAATTGGA 3'      | 60 °C                 | 159 bp       |
| Anti-sense             | 5' GAGGTGTTGGCAGTGGTG 3'      |                       |              |
| OTC: Sense             | 5' TTTGCTCCCTCACTGCAACT 3'    | 60 °C                 | 209 bp       |
| Anti-sense             | 5' TGTAGTGGTTGTCCACACCG 3'    |                       |              |
| ARG1: Sense            | 5' ACGGAAGAATCAGCCTGGTG 3'    | 60 °C                 | 281 bp       |
| Anti-sense             | 5' GTCCACGTCTCTCAAGCCAA 3'    |                       |              |
| ADH1C: Sense           | 5' GCACCTCCTAAGGCTCAT 3'      | 60 °C                 | 147 bp       |
| Anti-sense             | 5' TCCAACACTTCCACGAT 3'       |                       |              |
| c-Myc: Sense           | 5' CGGGGCTTTATCTAACTCGC 3'    | 60 °C                 | 224 bp       |
| Anti-sense             | 5' GCTATGGGCAAAGTTTCGTG 3'    |                       |              |
| HNF-4 $\alpha$ : Sense | 5' GATGACAATGAGTATGCCTACCT 3' | 65 °C                 | 132 bp       |
| Anti-sense             | 5' GTCGTTGATGTAGTCTCCAA 3'    |                       |              |
| HNF-1 $\alpha$ : Sense | 5' TTCGTGGGATACAGTCTTCTTAC 3' | 60 °C                 | 463 bp       |
| Anti-sense             | 5' ATGATGCTCTTGGGAACAAATAC 3' |                       |              |
| HNF-6: Sense           | 5' CCCTGGAGCAAACCTCAAATC 3'   | 62 °C                 | 147 bp       |
| Anti-sense             | 5' TGTGTGCCTCTATCCTTCC 3'     |                       |              |
| USF-1: Sense           | 5' TGGCACTGGTCAATCTTTGTG 3'   | 60 °C                 | 168 bp       |
| Anti-sense             | 5' GTTGCTGTCAATCTTGATTGAC 3'  |                       |              |
| $\beta$ -actin: Sense  | 5' CTCCATCCTGGCCTCGCTGT 3'    | 60 °C                 | 268 bp       |
| Anti-sense             | 5' GCTGTCACCTCACCGTTCC 3'     |                       |              |

**Supplementary Table S2.** Primers used for ChIP detection.

|                                    | Primers                             | Annealing temperature | Product size |
|------------------------------------|-------------------------------------|-----------------------|--------------|
| HNF-4 $\alpha$ to HNF-1 $\alpha$ : |                                     | 65°C                  | 196 bp       |
| Sense                              | 5' GTTCAGTCCCTTCGCTAAGCACACG 3'     |                       |              |
| Anti-sense                         | 5' CGGCAGACACAAACCAAACCTCCTTG 3'    |                       |              |
| HNF-4 $\alpha$ to USF-1 proximal:  |                                     | 60°C                  | 168 bp       |
| Sense                              | 5' AACTGGACTAAGTATCCTGTGCTCA 3'     |                       |              |
| Anti-sense                         | 5' ATCTCTGCCACTTCTTACCTCTGA 3'      |                       |              |
| HNF-4 $\alpha$ to USF-1 distal:    |                                     | 60°C                  | 360 bp       |
| Sense                              | 5' AAGTTTCCTGAGTGCCTATGATGA 3'      |                       |              |
| Anti-sense                         | 5' CAGCCTTCTCTGACCTTTGGAC 3'        |                       |              |
| USF-1 to HNF-6:                    |                                     | 65°C                  | 318 bp       |
| Sense                              | 5' TAGAGCCGAAGGGGTGATGACACAG 3'     |                       |              |
| Anti-sense                         | 5' GGCCTCCCGGTACAAATGAAGGAG 3'      |                       |              |
| HNF-6 to HNF-4 $\alpha$ proximal:  |                                     | 65°C                  | 343 bp       |
| Sense                              | 5' TCGAGGCAGCCTTATCTCTGCAAAAGC 3'   |                       |              |
| Anti-sense                         | 5' TCGAGGGGTGGGGTAATGGTTAATCGG 3'   |                       |              |
| HNF-6 to HNF-4 $\alpha$ distal:    |                                     | 65°C                  | 365 bp       |
| Sense                              | 5' GGCTCTGACACTGCAGAGTTCTAGAAC 3'   |                       |              |
| Anti-sense                         | 5' CCAAACCTTACCCAGCTGCTAATCATTGC 3' |                       |              |
| HNF-1 $\alpha$ to HNF-4 $\alpha$ : |                                     | 65°C                  | 343 bp       |
| Sense                              | 5' TCGAGGCAGCCTTATCTCTGCAAAAGC 3'   |                       |              |
| Anti-sense                         | 5' TCGAGGGGTGGGGTAATGGTTAATCGG 3'   |                       |              |
| NF- $\kappa$ B to iNOS-5212:       |                                     | 60 °C                 | 226 bp       |
| Sense                              | 5' AGGGAAGGGAGGGTGTCTGTTCTGGGGAG 3' |                       |              |
| Anti-sense                         | 5' TTGCCTGACTCGGAGATGACGGAAG 3'     |                       |              |

**Supplementary Table S3.** The oligonucleotides for HNF-4 $\alpha$  sites in HNF-1 $\alpha$  and USF-1 promoters.

| Oligonucleotides    |                                                        |
|---------------------|--------------------------------------------------------|
| HNF-1 $\alpha$ +428 |                                                        |
| forward             | biotin-5' GCAGGGCTGAAGTCCAAAGTTCAGTCCCTTCGCTAAGCAC 3'  |
| reverse             | biotin-5' GTGCTAGCGAAGGGACTGAACCTTGGACTTCAGCCCTGC 3'   |
| Mutant+428          |                                                        |
| forward             | biotin-5' GCAGGGCTGAAGTCCATGCGTTCAGTCCCTTCGCTAAGCAC 3' |
| reverse             | biotin-5' GTGCTAGCGAAGGGACTGACGCATGGACTTCAGCCCTGC 3'   |
| USF-1-2882          |                                                        |
| forward             | biotin-5' CCAAGGAAGAGAAGTCCAAAGGTCAGAAGAAGGCTGACAG 3'  |
| reverse             | biotin-5' CTGTCAGCCTTCTCTGACCTTGGACTTCTTCCCTTGG 3'     |
| Mutant-2882         |                                                        |
| forward             | biotin-5' CCAAGGAAGAGAAGTCCATGCGTTCAGAAGAAGGCTGACAG 3' |
| reverse             | biotin-5' CTGTCAGCCTTCTCTGACGCATGGACTTCTTCCCTTGG 3'    |
| USF-1-612           |                                                        |
| forward             | biotin-5' GTCAAAATGTTTGCCAAAGGTCTCAGAGGTAAGAAGTGGC 3'  |
| reverse             | biotin-5' GCCACTTCTTACCTCTGAGACCTTGGCAAACATTTTGAC 3'   |
| Mutant-612          |                                                        |
| forward             | biotin-5' GTCAAAATGTTTGCCATGCGTCTCAGAGGTAAGAAGTGGC 3'  |
| reverse             | biotin-5' GCCACTTCTTACCTCTGAGACGCATGGCAAACATTTTGAC 3'  |
